# Supplementary material for: Analysis of Antibodies Induced after SARS-CoV-2 Vaccination Using Antigen Coded Bead Array Luminex Technology
Source: Vaccines (Basel). 2023 Feb 15;11(2):442. doi: 10.3390/vaccines11020442 (PMC9964277; doi:10.3390/vaccines11020442)
Supplement: Supplementary file 1 [file vaccines-11-00442-s001.zip › Table S1-Report of the collection time of each sample.xlsx]

## Sheet: Sheet1
Number	Vaccination brand	Vaccination time (Y/M/D)			Blood collection time (Y/M/D)
		1st dose	2nd dose	3rd dose	Pre-vaccination	Post 1st dose	Post 2nd dose	Post 3rd dose
1	CoronaVac	2021-05-17	2021-06-15	——	2021/4/12	2021-05-27	2021-06-29	——
2	BBIBP-CorV	2021-07-11	2021-08-02	——	2021/4/12	2021-07-21	2021-08-24	——
3	ZF2001	2021-05-05	2021-07-23	2021-08-27	2021/4/12	2021-05-15	2021-08-02	2021-09-16
4	CoronaVac	2021-05-17	2021-06-17	——	2021/4/13	2021-05-27	2021-07-01	——
5	CoronaVac	2021-05-17	2021-06-17	——	2021/4/13	2021-05-27	2021-07-01	——
6	CoronaVac	2021-05-17	2021-06-17	——	2021-04-15	2021-05-27	2021-07-01	——
7	CoronaVac	2021-05-17	2021-06-25	——	2021-04-15	2021-05-27	2021-07-27	——
8	CoronaVac	2021-05-17	2021-06-17	——	——	2021-05-31	2021-07-01	——
9	CoronaVac	2021-05-17	2021-06-17	——	2021-05-17	2021-05-27	2021-07-05	——
10	CoronaVac	2021-07-13	2021-08-18	——	2021-05-17	2021/723	2021-08-31	——
11	CoronaVac	2021-05-17	2021-06-17	——	——	2021-05-27	2021-07-02	——
12	CoronaVac	2021-05-17	2021-06-10	——	——	2021-05-27	2021-07-05	——
13	CoronaVac	2021-05-20	2021-06-11	——	——	2021-05-28	2021-06-24	——
14	CoronaVac	2021-05-17	2021-06-17	——	——	2021-05-28	2021-07-01	——
15	CoronaVac	2021-05-17	2021-06-17	——	——	2021-06-08	2021-08-24	——
16	BBIBP-CorV	2021-03-20	2021-04-09	——	——	——	2021-06-24	——
17	CoronaVac	2021-04-30	2021-05-29	——	——	——	2021-06-24	——
18	BBIBP-CorV	2021-03-23	2021-05-05	——	——	——	2021-06-28	——
19	CoronaVac	2021-04-10	2021-05-04	——	——	——	2021-06-29	——
20	BBIBP-CorV	2021-05-24	2021-06-18	——	——	——	2021-07-01	——
21	CoronaVac	2021-05-17	2021-06-17	——	——	——	2021-07-01	——
22	BBIBP-CorV	2021-06-03	2021-06-24	——	——	——	2021-07-01	——
23	CoronaVac	2021-05-17	2021-06-17	——	——	——	2021-07-01	——
24	BBIBP-CorV	2021-03-20	2021-04-09	——	——	——	2021-07-08	——
25	CoronaVac	2021-10-27	2021-11-25	——	2021-09-15	2021-11-07	2021-12-19	——
26	BBIBP-CorV	2021-08-20	2021-10-01	——	——	——	2021-10-07	——
27	CoronaVac	2021-05-26	2021-06-18	——	——	——	2021-10-05	——
28	CoronaVac	2021-05-22	2021-06-15	——	——	——	2021-10-05	——
29	CoronaVac	2021-05-14	2021-06-15	——	——	——	2021-09-30	——
30	CoronaVac	2021-06-06	2021-06-26	——	——	——	2021-10-07	——
31	BBIBP-CorV	2021-05-16	2021-06-16	——	——	——	2021-10-01	——
32	ZF2001	——	2021-05-17	2021-06-12	——	——	——	2021-10-02
33	CoronaVac	2021-06-02	2021-06-25	——	——	——	2021-09-29	——
34	BBIBP-CorV	2021-01-16	2021-02-01	——	——	——	2021-10-02	——
35	CoronaVac	2021-05-19	2021-07-06	——	——	——	2021-10-07	——
36	BBIBP-CorV	2021-07-02	2021-07-30	——	——	——	2021-10-10	——
37	ZF2001	2021-05-13	2021-06-19	2021-08-23	——	——	——	2021-10-08
38	BBIBP-CorV	2021-07-02	2021-08-03	——	——	——	2021-10-15	——
39	ZF2001	2021-05-04	2021-06-05	2021-07-05	——	——	——	2021-10-15
40	Mixed Vaccination	2021-08-13	2021-09-10	——	——	——	2021-10-15	——
41	CoronaVac	2021-07-31	2021-08-26	——	——	——	2021-10-15	——
42	ZF2001	2021-05-28	2021-06-26	2021-08-10	——	——	——	2021-10-15
43	CoronaVac	2021-05-08	2021-06-10	——	——	——	2021-10-15	——
44	BBIBP-CorV	2021-07-05	2021-08-27	——	——	——	2021-10-15	——
45	CoronaVac	——	2021-08-06	——	——	——	2021-10-15	——
46	BBIBP-CorV	——	2021-03-25	——	——	——	2021-10-15	——
47	CoronaVac	——	2021-07-21	——	——	——	2021-10-15	——
48	CoronaVac	——	2021-08-25	——	——	——	2021-10-15	——
49	BBIBP-CorV	2021-05-11	2021-06-06	——	——	——	2021-10-15	——
50	BBIBP-CorV	2021-05-18	2021-06-10	——	——	——	2021-10-15	——
51	CoronaVac	2021-08-02	2021-08-29	——	——	——	2021-10-15	——
52	CoronaVac	2021-07-02	2021-07-28	——	——	——	2021-10-15	——
53	CoronaVac	2021-08-04	2021-08-26	——	——	——	2021-10-15	——
54	ZF2001	2021-05-22	2021-06-25	2021-07-27	——	——	——	2021-10-15
55	CoronaVac	2021-07-01	2021-07-31	——	——	——	2021-10-15	——
56	BBIBP-CorV	2021-07-04	2021-07-27	——	——	——	2021-10-15	——
57	CoronaVac	2021-08-02	2021-08-26	——	——	——	2021-10-15	——
58	Mixed Vaccination	2021-06-27	2021-07-18	——	——	——	2021-10-15	——
59	BBIBP-CorV	2021-05-18	2021-06-10	——	——	——	2021-10-15	——
60	ZF2001	2021-05-09	2021-06-10	2021-07-10	——	——	——	2021-10-15
61	BBIBP-CorV	——	2021-08-27	——	——	——	2021-10-15	——
62	Mixed Vaccination	2021-06-30	2021-07-27	——	——	——	2021-10-15	——
63	CoronaVac	2021-05-21	2021-06-12	——	——	——	2021-10-15	——
64	CoronaVac	2021-07-05	2021-08-15	——	——	——	2021-10-15	——
65	CoronaVac	——	2021-06-11	——	——	——	2021-10-15	——
66	CoronaVac	2021-05-06	2021-06-10	——	——	——	2021-10-15	——
67	CoronaVac	——	2021-08-31	——	——	——	2021-10-15	——
68	ZF2001	——	——	2021-04-02	——	——	——	2021-10-15
69	BBIBP-CorV	2021-06-30	2021-08-30	——	——	——	2021-10-15	——
70	CoronaVac	2021-05-06	2021-06-10	——	——	——	2021-10-15	——
71	CoronaVac	——	2021-06-14	——	——	——	2021-10-15	——
72	CoronaVac	2021-07-06	2021-07-29	——	——	——	2021-10-15	——
73	BBIBP-CorV	2021-05-18	2021-06-10	——	——	——	2021-10-15	——
74	BBIBP-CorV	2021-07-02	2021-07-25	——	——	——	2021-10-15	——
75	CoronaVac	2021-07-13	2021-08-17	——	——	——	2021-10-15	——
76	CoronaVac	2021-05-29	2021-06-30	——	——	——	2021-10-13	——
77	Mixed Vaccination	2021-07-01	2021-07-29	——	——	——	2021-10-13	——
78	CoronaVac	2021-05-12	2021-06-11	——	——	——	2021-10-15	——
79	BBIBP-CorV	——	2021-06-27	——	——	——	2021-10-15	——
80	BBIBP-CorV	2021-05-08	2021-06-20	——	——	——	2021-10-13	——
81	BBIBP-CorV	2021-05-17	2021-06-18	——	——	——	2021-10-13	——
82	CoronaVac	2021-07-05	2021-07-31	——	——	——	2021-10-14	——
83	BBIBP-CorV	2021-05-18	2021-06-21	——	——	——	2021-10-13	——
84	BBIBP-CorV	2021-07-09	2021-08-10	——	——	——	2021-10-15	——
85	BBIBP-CorV	2021-03-27	2021-05-12	——	——	——	2021-10-15	——
86	BBIBP-CorV	2021-07-20	2021-08-11	——	——	——	2021-10-13	——
87	CoronaVac	2021-06-30	2021-07-22	——	——	——	2021-10-14	——
88	CoronaVac	2021-07-13	2021-08-06	——	——	——	2021-10-14	——
89	CoronaVac	2021-06-11	2021-07-02	——	——	——	2021-10-13	——
90	BBIBP-CorV	2021-05-18	2021-06-21	——	——	——	2021-10-13	——
91	CoronaVac	2021-05-02	2021-06-24	——	——	——	2021-10-14	——
92	CoronaVac	2021-05-12	2021-06-17	——	——	——	2021-10-13	——
93	BBIBP-CorV	2021-07-18	2021-08-26	——	——	——	2021-10-13	——
94	CoronaVac	2021-05-16	2021-06-10	——	——	——	2021-10-14	——
95	CoronaVac	2021-07-04	2021-07-26	——	——	——	2021-10-15	——
96	CoronaVac	2021-09-03	2021-10-06	——	——	——	2021-10-14	——
97	CoronaVac	2021-08-02	2021-08-24	——	——	——	2021-10-13	——
98	BBIBP-CorV	2021-05-18	2021-06-21	——	——	——	2021-10-15	——
99	Mixed Vaccination	2021-07-02	2021-07-23	——	——	——	2021-10-13	——
100	BBIBP-CorV	2021-08-07	2021-08-28	——	——	——	2021-10-13	——
